# Supplementary material
Source: Springer Nature journal article supplement (https://www.springermedizin.de/resource/supplementary/12874_2012_866_MOESM3_ESM.pdf/9432698)
Supplement: MOESM3 [file 9432698]

# Report sheet for the programme driven activity indicators

| Indicators                                                                                                                                                                                                                                                                                                                         | First Period | add as many columns as the number of intervention periods | Observation                                                                                                                            |
|------------------------------------------------------------------------------------------------------------------------------------------------------------------------------------------------------------------------------------------------------------------------------------------------------------------------------------|--------------|-----------------------------------------------------------|----------------------------------------------------------------------------------------------------------------------------------------|
| <b>The delivery of the intervention</b>                                                                                                                                                                                                                                                                                            |              |                                                           |                                                                                                                                        |
| <b>Quantity</b>                                                                                                                                                                                                                                                                                                                    |              |                                                           |                                                                                                                                        |
| <i>Supervisors' information</i>                                                                                                                                                                                                                                                                                                    |              |                                                           |                                                                                                                                        |
| <p>As a whole have the planned activities been implemented ?</p> <p>Have the planned activity 1 (<i>please name of activity</i>) been implemented ?</p> <p>Have the planned activity 2 (<i>please name of activity</i>) been implemented ?</p> <p><i>add as many lines as the number of identified activities</i></p>              |              |                                                           | <p><b>Answers:</b> may be expressed on a binary scale (yes/no) or a Likert scale (totally, partially, almost not) or in percentage</p> |
| <i>Anchormen' information</i>                                                                                                                                                                                                                                                                                                      |              |                                                           |                                                                                                                                        |
| <p>As a whole have the planned activities been implemented ?</p> <p>*</p>                                                                                                                                                                                                                                                          |              |                                                           | <p><b>Answers:</b> may be expressed on a binary scale (yes/no) or a Likert scale (totally, partially, almost not) or in percentage</p> |
| <i>Target persons' information</i>                                                                                                                                                                                                                                                                                                 |              |                                                           |                                                                                                                                        |
| <p>As a whole have the planned activities been implemented ?</p> <p>*</p>                                                                                                                                                                                                                                                          |              |                                                           | <p><b>Answers:</b> may be expressed on a binary scale (yes/no) or a Likert scale (totally, partially, almost not) or in percentage</p> |
| <p><b>Delivery quantity mark ( /maximal assignable mark)</b></p>                                                                                                                                                                                                                                                                   |              |                                                           |                                                                                                                                        |
| <b>The delivery of the intervention</b>                                                                                                                                                                                                                                                                                            |              |                                                           |                                                                                                                                        |
| <b>Quality</b>                                                                                                                                                                                                                                                                                                                     |              |                                                           |                                                                                                                                        |
| <i>Supervisors' information</i>                                                                                                                                                                                                                                                                                                    |              |                                                           |                                                                                                                                        |
| <p>As a whole have the objectives been achieved ?</p> <p>Have the activity 1 (<i>please name of activity</i>) been produced any perceptible change ?</p> <p>Have the activity 2 (<i>please name of activity</i>) been produced any perceptible change ?</p> <p><i>add as many lines as the number of identified activities</i></p> |              |                                                           | <p><b>Answers:</b> may be expressed on a Likert scale (totally, partially, almost not) or in percentage</p>                            |
| <i>Anchormen' information</i>                                                                                                                                                                                                                                                                                                      |              |                                                           |                                                                                                                                        |
| <p>As a whole have the objectives been achieved ?</p> <p>*</p>                                                                                                                                                                                                                                                                     |              |                                                           | <p><b>Answers:</b> may be expressed on a Likert scale (totally, partially, almost not) or in percentage</p>                            |
| <i>Target persons' information</i>                                                                                                                                                                                                                                                                                                 |              |                                                           |                                                                                                                                        |
| <p>As a whole have the activities been useful?*</p> <p>*</p>                                                                                                                                                                                                                                                                       |              |                                                           | <p><b>Answers:</b> may be expressed on a Likert scale (totally, partially, almost not) or in percentage</p>                            |
| <p><b>Delivery quality mark ( /maximal assignable mark)</b></p>                                                                                                                                                                                                                                                                    |              |                                                           |                                                                                                                                        |
| <b>Participation in the activities</b>                                                                                                                                                                                                                                                                                             |              |                                                           |                                                                                                                                        |
| <b>Quantity</b>                                                                                                                                                                                                                                                                                                                    |              |                                                           |                                                                                                                                        |
| <i>Supervisors' information</i>                                                                                                                                                                                                                                                                                                    |              |                                                           |                                                                                                                                        |
| <p>As a whole how many anchormen received the formation ?</p> <p>As a whole how many anchormen implemented the activity near the target persons?</p> <p>As a whole how many target person received the intervention ?</p> <p>*</p>                                                                                                 |              |                                                           | <p>percentage</p> <p>percentage</p> <p>percentage</p>                                                                                  |
| <i>Anchormen' information</i>                                                                                                                                                                                                                                                                                                      |              |                                                           |                                                                                                                                        |
| <p>As a whole how many target persons received the intervention ?</p> <p>*</p>                                                                                                                                                                                                                                                     |              |                                                           | <p>percentage</p>                                                                                                                      |
| <i>Target persons' information</i>                                                                                                                                                                                                                                                                                                 |              |                                                           |                                                                                                                                        |
| <p>As a whole how many target persons declared having participated?</p> <p>*</p>                                                                                                                                                                                                                                                   |              |                                                           | <p>percentage</p>                                                                                                                      |
| <p><b>Participation quantity mark ( /maximal assignable mark)</b></p>                                                                                                                                                                                                                                                              |              |                                                           |                                                                                                                                        |
| <b>Participation in the activities</b>                                                                                                                                                                                                                                                                                             |              |                                                           |                                                                                                                                        |
| <b>Quality</b>                                                                                                                                                                                                                                                                                                                     |              |                                                           |                                                                                                                                        |
| <i>Supervisors' information</i>                                                                                                                                                                                                                                                                                                    |              |                                                           |                                                                                                                                        |
| <p>As a whole have the target persons participated well ?</p> <p>*</p>                                                                                                                                                                                                                                                             |              |                                                           | <p><b>Answers:</b> may be expressed on a Likert scale (totally, partially, almost not) or in percentage</p>                            |
| <i>Anchormen' information</i>                                                                                                                                                                                                                                                                                                      |              |                                                           |                                                                                                                                        |
| <p>As a whole have the target persons participated well ?</p> <p>*</p>                                                                                                                                                                                                                                                             |              |                                                           | <p><b>Answers:</b> may be expressed on a Likert scale (totally, partially, almost not) or in percentage</p>                            |
| <i>Target persons' information</i>                                                                                                                                                                                                                                                                                                 |              |                                                           |                                                                                                                                        |
| <p>As a whole how much target persons were satisfied with the intervention?***:</p> <p>*</p>                                                                                                                                                                                                                                       |              |                                                           | <p><b>Answers:</b> may be expressed on a Likert scale (totally, partially, almost not) or in percentage</p>                            |
| <p><b>Participation quality mark ( /maximal assignable mark)</b></p>                                                                                                                                                                                                                                                               |              |                                                           |                                                                                                                                        |

\* If needed, add as many lines as the number of identified activities, and using the previous template used for supervisors' information and modifying the formulation according to the formulation used in the "as a whole" statement  
 \*\* if needed replaced by as many lines as the indicators used it investigate this quality aspect
